# Supplementary material
Source: Springer Nature journal article supplement (https://www.springermedizin.de/resource/supplementary/12885_2014_4965_MOESM3_ESM.pdf/9467872)
Supplement: MOESM3 [file 9467872]

Table S2. Distribution of genetic alterations in each gene

| Gene Name <sup>a</sup>    | Genetic alterations identified | n  | (%) |
|---------------------------|--------------------------------|----|-----|
| <i>EGFR</i> (8, 6.2%)     | ex19del                        | 3  |     |
|                           | L858R                          | 4  |     |
|                           | L858R + T790M                  |    |     |
|                           | ex20ins                        |    |     |
|                           | ex19del + T790M                |    |     |
|                           | ex19del + L858R                |    |     |
|                           | G719S                          |    |     |
|                           | G719A                          | 1  |     |
|                           | L861Q                          | 2  |     |
|                           | ex19del + L858R + T790M        | 1  |     |
|                           | G719S + L861Q + T790M          | 1  |     |
|                           | Gene copy number gain          | 6  |     |
| <i>KRAS</i> (5, 3.9%)     | G12C                           | 2  |     |
|                           | G12D                           |    |     |
|                           | G12A                           |    |     |
|                           | G12V                           | 1  |     |
|                           | Q61H                           | 1  |     |
|                           | G12S                           | 1  |     |
|                           | G12F                           |    |     |
|                           | Gene copy number gain          | 19 |     |
| <i>PIK3CA</i> (17, 13.2%) | E545K                          | 11 |     |
|                           | H1047R                         | 3  |     |
|                           | E545Q                          | 1  |     |
|                           | E542K                          | 2  |     |
|                           | Gene copy number gain          | 19 |     |
| <i>NRAS</i> (1, 0.8%)     | Q61R                           | 1  |     |
|                           | Q61K                           |    |     |
| <i>AKT1</i> (1, 0.8%)     | E17K                           | 1  |     |
| <i>FGFR1</i> (6, 4.7%)    | Gene copy number gain          | 6  |     |
| <i>RET</i> (1/66, 1.5 %)  | <i>KIF5B-RET</i> variant 2     | 1  |     |

<sup>a</sup>Numbers in parentheses next to gene names indicate the number and frequency of patients who harbor genetic alterations in each gene.
